# Supplementary material for: Application of an inducible transposon with anther culture in generation of di-haploid homologous mutants
Source: PubMed Central journal article supplement (PMC5432829; doi:10.1186/1999-3110-55-27), 2014-02-24

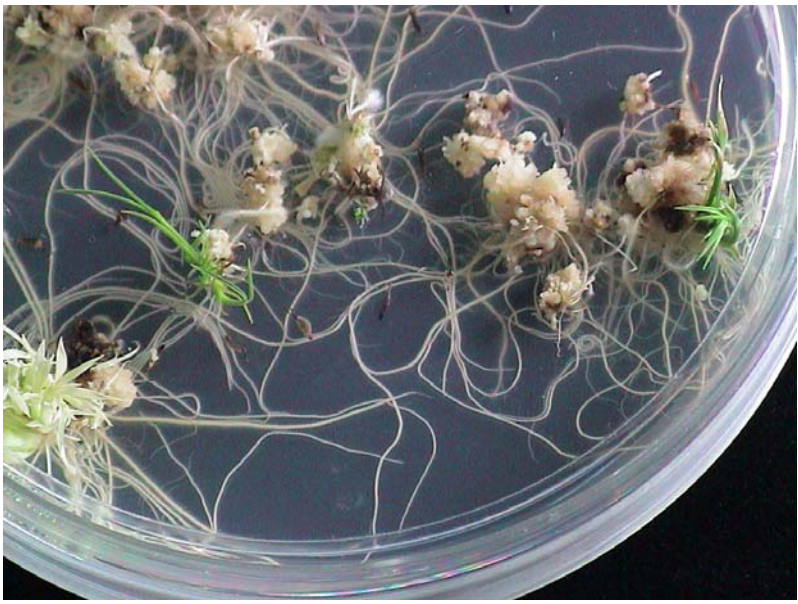

Supplement: 40529_2013_78_MOESM2_ESM.pdf [file 40529_2013_78_MOESM2_ESM.pdf]
