# Supplementary material for: Application of an inducible transposon with anther culture in generation of di-haploid homologous mutants
Source: PubMed Central journal article supplement (PMC5432829; doi:10.1186/1999-3110-55-27), 2014-02-24
Supplement: 40529_2013_78_MOESM4_ESM.pdf [file 40529_2013_78_MOESM4_ESM.pdf]

S 19H3 19H5 19C2 17H3 24C2 20H6

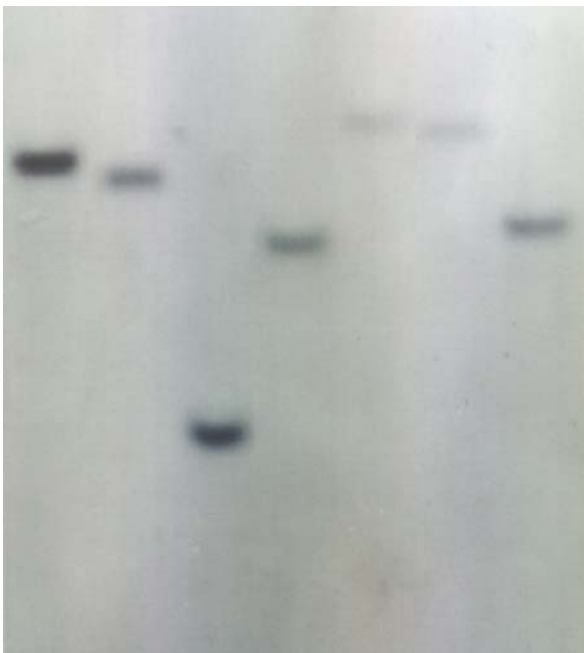

— 23.1 Kb

— 9.4 Kb

— 6.6 Kb

— 4.4 Kb

— 2.3 Kb

— 2.0 Kb
